# Supplementary material for: Altered attentive bias towards interpersonal communication information across phases of schizophrenia: an eye-tracking study
Source: HighWire-hosted journal article supplement (doi:10.1136/gpsych-2021-100699), 2022-04-01
Supplement: gpsych-2021-100699supp001_data_supplement.pdf [file gpsych-2021-100699supp001_data_supplement.pdf]

Supplementary Table1. Post-hoc analysis of initial fixation duration of Mode III in whole sample

|                | t      | p      |
|----------------|--------|--------|
| HC vs CHR      | -0.709 | 0.479  |
| HC vs FEZ      | -0.005 | 0.996  |
| HC vs Chronic  | 2.648  | 0.009* |
| CHR vs FEZ     | 0.616  | 0.539  |
| CHR vs Chronic | 2.990  | 0.003* |
| FEZ vs Chronic | 2.206  | 0.030* |

HC = healthy controls, CHR = clinical high risk, FEZ = first episode schizophrenia, Chronic = chronic inpatient group

\*p<0.05

Supplementary Table2. Post-hoc analysis of gender difference in initial fixation duration of Mode III, mean(SD)

|        | HC(n=41)    | CHR(n=38)   | FEZ(n=22)   | Chronic(n=15) | F     | p      |
|--------|-------------|-------------|-------------|---------------|-------|--------|
| female | 0.28(0.379) | 0.41(0.508) | 0.24(0.459) | -0.01(0.232)  | 2.999 | 0.034* |
|        | HC(n=33)    | CHR(n=40)   | FEZ(n=46)   | Chronic(n=24) | F     | p      |
| male   | 0.36(0.341) | 0.32(0.310) | 0.35(0.460) | 0.21(0.365)   | 0.845 | 0.472  |

HC = healthy controls, CHR = clinical high risk, FEZ = first episode schizophrenia, Chronic = chronic inpatient group

\*p<0.05

Supplementary Table3. Post-hoc analysis of initial fixation duration of Mode III in female

|                | t      | p         |
|----------------|--------|-----------|
| HC vs CHR      | -1.302 | 0.197     |
| HC vs FEZ      | 0.357  | 0.722     |
| HC vs Chronic  | 2.706  | 0.009*    |
| CHR vs FEZ     | 1.298  | 0.199     |
| CHR vs Chronic | 4.079  | <0.0001** |
| FEZ vs Chronic | 1.903  | 0.065     |

HC = healthy controls, CHR = clinical high risk, FEZ = first episode schizophrenia, Chronic = chronic inpatient group

\*p<0.05, \*\*p<0.001
